# Supplementary material for: The efficacy of chimeric antigen receptor (CAR) immunotherapy in animal models for solid tumors: A systematic review and meta-analysis
Source: PubMed Central journal article supplement (PMC5687736; doi:10.1371/journal.pone.0187902), 2017-11-15

**Fig S1.** The process of trial selection.

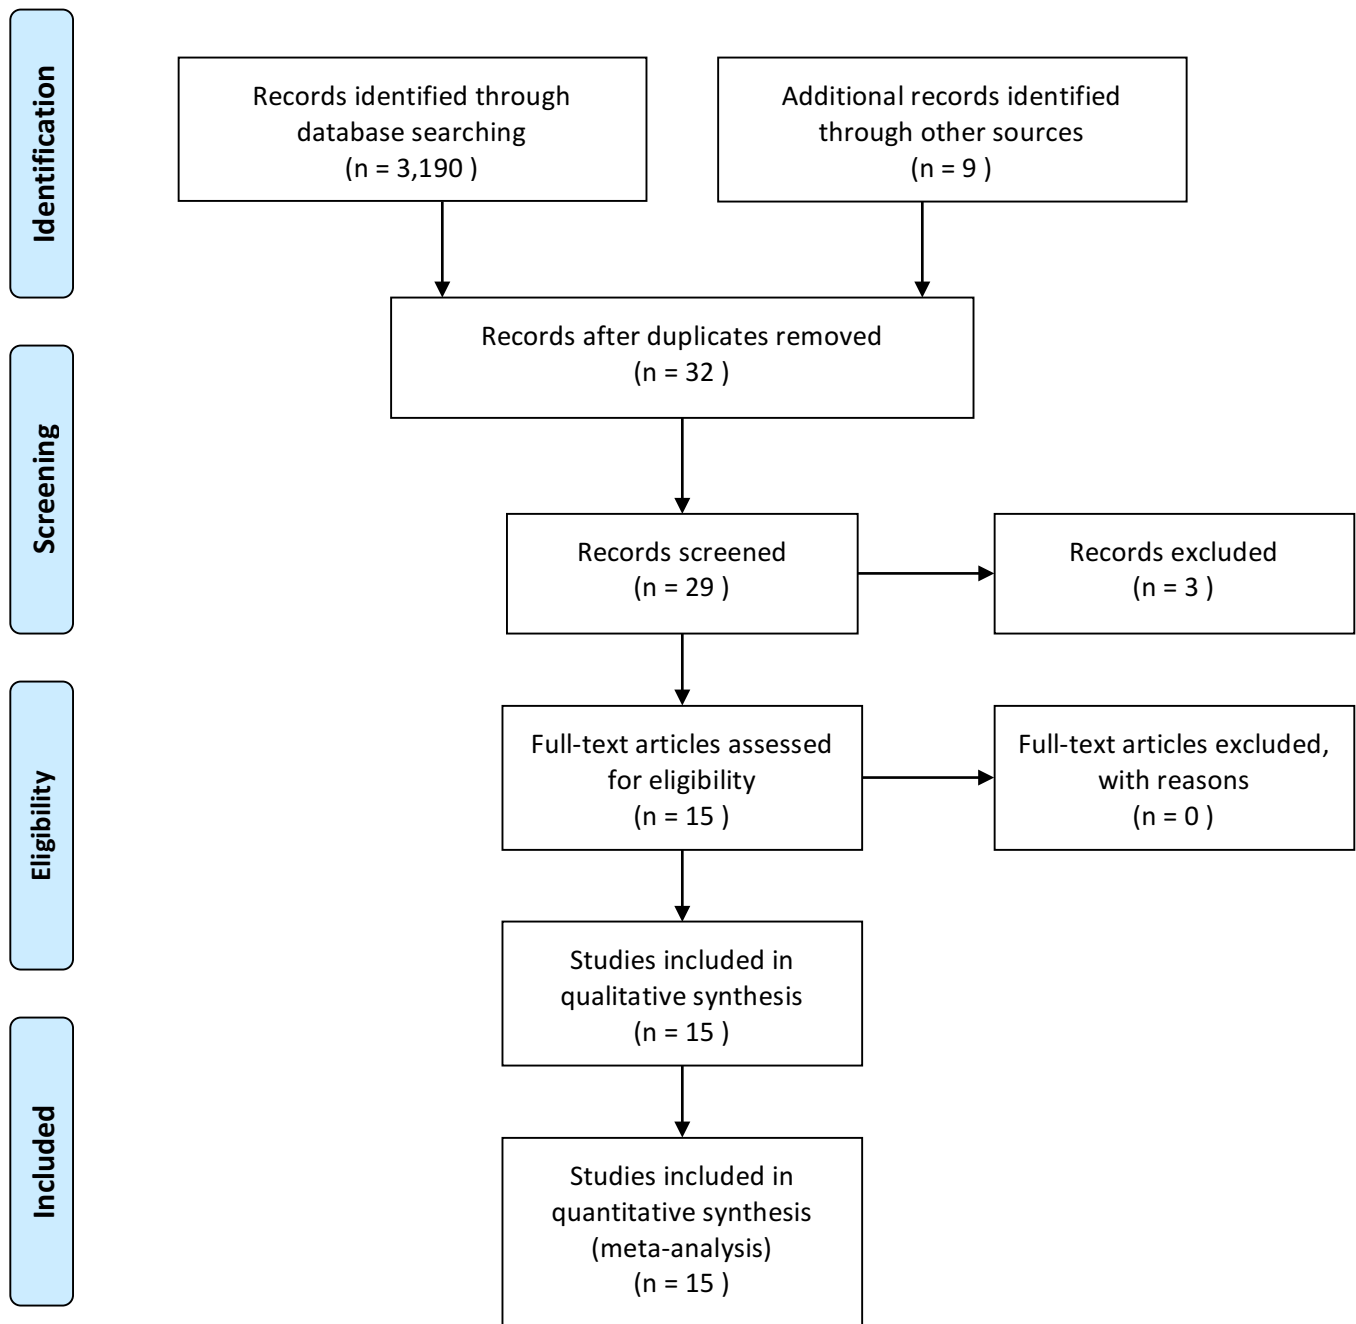

Supplement: pone.0187902.s001.pdf [file pone.0187902.s001.pdf]
